# Supplementary material for: Changes in degrading ability, populations and metabolism of microbes in activated sludge in the treatment of phenol wastewater
Source: Royal Society of Chemistry journal article supplement (doi:10.1039/c7ra09225c), 2017-01-01
Supplement: c7ra09225c1.pdf [file c7ra09225c1.pdf]

**Supplementary information for**  
**Changes in degrading ability, populations and metabolisms of**  
**activated sludge in the treatment of phenol wastewater**

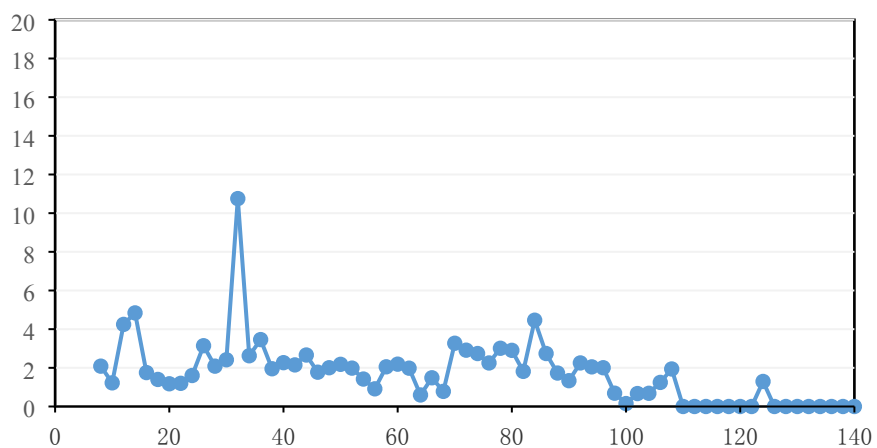

**Fig. S1** Ratio of utilized phenol (mol/L) to ammonium (mol/L)

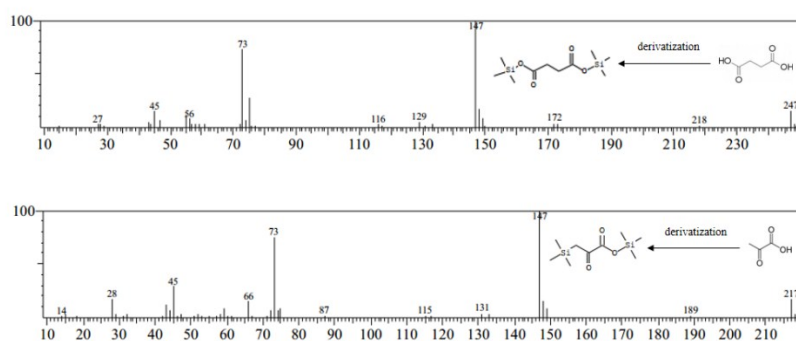

**Fig. S2** Intermediates identification by GC-MS
